# Supplementary material for: The Association between Alcohol Consumption and Serum Metabolites and the Modifying Effect of Smoking
Source: MDPI journal article supplement (doi:10.3390/nu11102331), 2019-10-01
Supplement: s1 [file s1]

## Supplementary

### The association between alcohol consumption and serum metabolites and the modifying effect of smoking

**Table S1.** Second order polynomial regression analysis of alcohol consumption and metabolite pattern scores in male participants

| Metabolite pattern | Independent Variable <sup>a</sup>        | $\beta$ (CI)               | p-Value |
|--------------------|------------------------------------------|----------------------------|---------|
| AAs, SUG, Acs      | Alcohol consumption (12g/d)              | -0.064<br>(-0.190 – 0.063) | 0.322   |
|                    | Alcohol consumption (12g/d) <sup>2</sup> | -0.000<br>(-0.000 – 0.000) | 0.673   |
| acyl-alkyl PCs     | Alcohol consumption (12g/d)              | 0.018<br>(-0.041 – 0.078)  | 0.545   |
|                    | Alcohol consumption (12g/d) <sup>2</sup> | -0.000<br>(-0.000 – 0.000) | 0.990   |

Abbreviation: AAs, SUG, Acs, Amino acids, sugar and free and short chain acylcarnitines; acyl-alkyl PCs, Acyl-alkyl-phosphatidylcholine; CI, confidence interval; adjusted for: age, body shape, physical activity index, socioeconomic status, eggs, dairy products, fish, meat, antihypertensive, diuretic, lipidlower, antiphlogistika, antibiotics, nutritional supplement, cancer; <sup>a</sup> Alcohol consumption is defined as alcohol consumption during the 12 months prior to recruitment per 12g/d; Alcohol consumption (12g/d) <sup>2</sup> is the transformed variable of alcohol consumption we used for the polynomial regression analysis

**Table S2:** Second order polynomial regression analysis of alcohol consumption and metabolite pattern scores in female participants

| Metabolite pattern               | Independent Variable <sup>a</sup>        | $\beta$ (CI)               | p-Value |
|----------------------------------|------------------------------------------|----------------------------|---------|
| AAs, SUG, ACs                    | Alcohol consumption (12g/d)              | -0.093<br>(-0.350 – 0.164) | 0.479   |
|                                  | Alcohol consumption (12g/d) <sup>2</sup> | 0.000<br>(-0.000 – 0.001)  | 0.745   |
| ACs I                            | Alcohol consumption (12g/d)              | 0.067<br>(-0.151 – 0.285)  | 0.548   |
|                                  | Alcohol consumption (12g/d) <sup>2</sup> | -0.000<br>(-0.000 – 0.000) | 0.661   |
| ACs II                           | Alcohol consumption (12g/d)              | -0.076<br>(-0.311 – 0.158) | 0.523   |
|                                  | Alcohol consumption (12g/d) <sup>2</sup> | 0.000<br>(-0.000 – 0.000)  | 0.872   |
| ACs III                          | Alcohol consumption (12g/d)              | -0.059<br>(-0.262 – 0.143) | 0.567   |
|                                  | Alcohol consumption (12g/d) <sup>2</sup> | -0.000<br>(-0.000 – 0.000) | 0.822   |
| diacyl, acyl-alkyl, lysoPCs, SMs | Alcohol consumption (12g/d)              | 0.056<br>(-0.369 – 0.480)  | 0.797   |
|                                  | Alcohol consumption (12g/d) <sup>2</sup> | -0.000<br>(-0.001 – 0.001) | 0.797   |
| diacyl, acyl-alkyl PCs           | Alcohol consumption (12g/d)              | -0.072<br>(-0.350 – 0.207) | 0.614   |
|                                  | Alcohol consumption (12g/d) <sup>2</sup> | -0.000<br>(-0.001 – 0.000) | 0.763   |

adjusted for: age, body shape, physical activity index, socioeconomic status, eggs, dairy products, fish, meat, antihypertensive, diuretic, lipidlower, antiphlogistika, antibiotics, nutritional supplement, cancer, contraceptives and hormone replacement therapy; Abbreviation: AAs, SUG, Acs, Amino acids, sugar and free and short chain acylcarnitines; acyl-alkyl PCs, Acyl-alkyl-phosphatidylcholine; CI, confidence interval; <sup>a</sup> Alcohol consumption is defined as alcohol consumption during the 12 months prior to recruitment per 12g/d; Alcohol consumption (12g/d) <sup>2</sup> is the transformed variable of alcohol consumption we used for the polynomial regression analysis;

**Table S3.** Summary of small polar metabolite patterns of male participants

| Name metabolite pattern | Proportion of explained Variance in % | Number of metabolites | Metabolites (Loadings)                                                                                                                                                                                                                                                                                                                       | Stability in % |
|-------------------------|---------------------------------------|-----------------------|----------------------------------------------------------------------------------------------------------------------------------------------------------------------------------------------------------------------------------------------------------------------------------------------------------------------------------------------|----------------|
| AAs, SUG, ACs           | 41.28                                 | 17                    | <u>Acylcarnitines</u> : C0(0.20), C3(0.20), <u>Sugar</u> : Hexose(0.23), <u>Amino acids</u> : Proline(0.23), Glycine(0.24), Serine(0.24), Threonine(0.24), Arginine(0.24), Tyrosine(0.24), Ornithine(0.25), Glutamine(0.25), Histidine(0.25), Methionine(0.25), Tryptophan(0.26), Phenylalanine(0.26), Valine(0.26), Leucine/Isoleucin(0.26) | 86             |
| ACs I                   | 14.03                                 | 6                     | <u>Acylcarnitines</u> : C18:2(0.37), C18(0.39), C14:1(0.41), C2(0.42), C16(0.43), C18:1(0.43)                                                                                                                                                                                                                                                | 89             |
| ACs II                  | 9.51                                  | 4                     | <u>Acylcarnitines</u> : C16:2(0.47), C10(0.50), C14:2(0.51), C7-DC(0.51)                                                                                                                                                                                                                                                                     | 92             |

Abbreviation: AAs, SUG, ACs, Amino acids, sugar and free and short chain acylcarnitines; ACs I, Long and short chain acylcarnitines; ACs II, Medium and long chain acylcarnitines; Acylcarnitines are abbreviated as Cx:y, where x and y are the the cumulative number of carbon atoms and number of double bonds, respectively.

**Table S4.** Summary of lipid metabolite patterns of male participants

| Name metabolite patterns      | Proportion of explained Variance in % | Number of metabolites | Metabolites (Loadings)                                                                                                                                                                                                                                                                                                                                                                                                                    | Stability in % |
|-------------------------------|---------------------------------------|-----------------------|-------------------------------------------------------------------------------------------------------------------------------------------------------------------------------------------------------------------------------------------------------------------------------------------------------------------------------------------------------------------------------------------------------------------------------------------|----------------|
| diacyl PCs, acyl-alkyl PCs I  | 25.04                                 | 27                    | <u>Phosphatidylcholine diacyl</u> : C34:1(0.19), C34:2(0.19), C36:1(0.19), C36:2(0.19), C36:3(0.19), C36:4(0.19), C38:3(0.19), C38:4(0.19), C38:5(0.19), C40:4(0.19), C40:5(0.19), <u>Phosphatidylcholine acyl-alkyl</u> : C32:1(0.19), C34:1(0.19), C34:2(0.19), C34:3(0.19), C36:1(0.19), C36:2(0.19), C36:3(0.19), C38:2(0.19), C38:3(0.19), C38:4(0.19), C38:6(0.19), C40:3(0.19), C40:5(0.19), C36:4(0.20), C36:5(0.20), C38:5(0.20) | 60             |
| SMs                           | 10.67                                 | 11                    | <u>Hydroxysphingomyelin</u> : C14:1(0.30), C16:1(0.30), C22:1(0.30), C22:2(0.30), C24:1(0.30), <u>Sphingomyelin</u> : C16:0(0.30), C16:1(0.30), C18:0(0.30), C18:1(0.30), C20:2 C24:0(0.30), C24:1(0.30)                                                                                                                                                                                                                                  | 87             |
| lysoPCs                       | 3.95                                  | 4                     | <u>lysoPhosphatidylcholine acyl</u> : C20:4(0.49), C18:1(0.50), C16:0(0.51), C18:0(0.51)                                                                                                                                                                                                                                                                                                                                                  | 87             |
| diacyl PCs                    | 3                                     | 3                     | <u>Phosphatidylcholine diacyl</u> : C32:2(0.58), C34:3(0.58), C34:4(0.58)                                                                                                                                                                                                                                                                                                                                                                 | 54             |
| diacyl PCs, acyl-alkyl PCs II | 2.98                                  | 3                     | <u>Phosphatidylcholine acyl-alkyl</u> : C38:0(0.57), <u>Phosphatidylcholine diacyl</u> : C36:5(0.58), C36:6(0.58)                                                                                                                                                                                                                                                                                                                         | 88             |
| acyl-alkyl PCs                | 2.03                                  | 2                     | <u>Phosphatidylcholine acyl-alkyl</u> : C42:2(0.71), C42:3(0.71)                                                                                                                                                                                                                                                                                                                                                                          | 62             |

Abbreviations: acyl-alkyl PCs, Acyl-alkyl-phosphatidylcholine; diacyl PCs, Diacyl-phosphatidylcholines; diacyl PCs, acyl-alkyl PCs I, Diacyl-glycerophosphocholines and acyl-alkyl-phosphatidylcholine I; diacyl PCs, acyl-alkyl PCs II, Diacyl-phosphatidylcholines and acyl-alkyl-phosphatidylcholine II; lysoPCs, Lyso-phosphatidylcholines; SMs, Sphingomyelins; The lipids are abbreviated as Cx:y, where x and y are the the cumulative number of carbon atoms and number of double bonds, respectively.

**Table S5.** Summary of small polar metabolite patterns of female participants

| Name metabolite patterns | Proportion of explained Variance in % | Number of metabolites | Metabolites (Loadings)                                                                                                                                                                                                                                                                                                                        | Stability in % |
|--------------------------|---------------------------------------|-----------------------|-----------------------------------------------------------------------------------------------------------------------------------------------------------------------------------------------------------------------------------------------------------------------------------------------------------------------------------------------|----------------|
| AAs, SUG, ACs            | 37.44                                 | 17                    | <u>Acylcarnitines</u> : C0(0.19), C3(0.19), <u>Amino acids</u> : Glycine(0.20), Threonine(0.23), Tyrosine(0.23), Ornithine(0.24), Proline(0.24), Serine(0.24), Arginine(0.25), Glutamine(0.26), Histidine(0.26), Methionine(0.26), Phenylalanine(0.27), Tryptophan(0.27), Valine(0.27), Leucine/Isoleucin(0.27), <u>Sugar</u> : Hexose(0.24), | 89             |
| ACs I                    | 13.16                                 | 6                     | <u>Acylcarnitines</u> : C18(0.38), C18:2(0.38), C14:1(0.40), C2(0.42), C16(0.44), C18:1(0.44)                                                                                                                                                                                                                                                 | 91             |
| ACs II                   | 9.44                                  | 4                     | <u>Acylcarnitines</u> : C16:2(0.48), C10(0.50), C14:2 (0.51), C7-DC(0.51)                                                                                                                                                                                                                                                                     | 81             |
| ACs III                  | 7                                     | 3                     | <u>Acylcarnitines</u> : C10(0.57), C3(0.58), C3-DC-M /C5-OH(0.58)                                                                                                                                                                                                                                                                             | 92             |

Abbreviation: AAs, SUG, ACs, Amino acids, sugar and free and short chain acylcarnitines; ACs I, Long and short chain acylcarnitines; ACs II, Medium and long chain acylcarnitines; ACs III, Short and medium chain acylcarnitines; acylcarnitines are abbreviated as Cx:y, where x and y are the the cumulative number of carbon atoms and number of double bonds, respectively.

**Table S6.** Summary of lipid metabolite patterns of female participants

| Name metabolite patterns         | Proportion of explained Variance in % | Number of metabolites | Metabolites (Loadings)                                                                                                                                                                                                                                                                                                                                                                                                                                                                                                                                                                                                                                                                                                                                                                                                                                                                                                                                                                                                                                                                                               | Stability in % |
|----------------------------------|---------------------------------------|-----------------------|----------------------------------------------------------------------------------------------------------------------------------------------------------------------------------------------------------------------------------------------------------------------------------------------------------------------------------------------------------------------------------------------------------------------------------------------------------------------------------------------------------------------------------------------------------------------------------------------------------------------------------------------------------------------------------------------------------------------------------------------------------------------------------------------------------------------------------------------------------------------------------------------------------------------------------------------------------------------------------------------------------------------------------------------------------------------------------------------------------------------|----------------|
| diacyl, acyl-alkyl, lysoPCs, SMs | 57.9                                  | 73                    | <u>Phosphatidylcholine diacyl</u> : C 42:2(0.09), C30:0(0.10), C32:1(0.10), C36:0(0.10), C38:0(0.10), C42:5(0.10), C32:2(0.11), C34:3(0.11), C34:4(0.11), C36:5(0.11), C36:6(0.11), C40:2(0.11), C40:3(0.11), C40:5(0.11), C42:4(0.11), C28:1(0.12), C32:3(0.12), C34:1(0.12), C36:1(0.12), C36:3(0.12), C38:5(0.12), C38:6(0.12), C34:2(0.13), C36:2(0.13), C36:4(0.13), C38:3(0.13), C38:4(0.13), C40:4(0.13) <u>Phosphatidylcholine acyl-alkyl</u> : C40:1(0.10), C42:1(0.10), 38:0(0.11), C38:1(0.11), 32:1(0.12), C32:2(0.12), C34:0(0.12), C34:1(0.12), C34:2(0.12), C34:3(0.12), C36:1(0.12), C36:2(0.12), C36:3(0.12), C38:2(0.12), C38:3(0.12), C38:4(0.12), C38:6(0.12), C40:2(0.12), C40:3(0.12), C40:5(0.12), C40:6(0.12), C42:2(0.12), C42:3(0.12), C36:4(0.13), C36:5(0.13), C38:5(0.13) <u>LysoPhosphatidylcholine</u> : C16:0(0.11), C16:1(0.11), C17:0(0.11), C18:0(0.11), C18:1(0.11), C20:4(0.11), <u>Sphingomyelin</u> : C14:1(0.12), C16:1(0.12), C22:1(0.12), C22:2(0.12), C24:1(0.12), C26:0(0.10), C26:1(0.10), C16:0(0.12), C16:1(0.12), C18:0(0.12), C18:1(0.12), C24:0(0.12), C24:1(0.12) | 44             |
| diacyl, acyl-alkyl PCs           | 6.87                                  | 8                     | <u>Phosphatidylcholine diacyl</u> : C42:0(0.35), C42:1(0.35), <u>Phosphatidylcholine acyl-alkyl</u> : C42:4(0.33), C44:4(0.34), C40:4(0.35), C44:5(0.37), C44:6(0.37), C42:5(0.37)                                                                                                                                                                                                                                                                                                                                                                                                                                                                                                                                                                                                                                                                                                                                                                                                                                                                                                                                   | 72             |
| acyl-alkyl, lysoPC               | 1.87                                  | 2                     | <u>Phosphatidylcholine acyl-alkyl</u> : C30:2(0.71), <u>lysoPhosphatidylcholine</u> : C28:1(0.71)                                                                                                                                                                                                                                                                                                                                                                                                                                                                                                                                                                                                                                                                                                                                                                                                                                                                                                                                                                                                                    | 71             |

Abbreviations: acyl-alkyl, lysoPC, Acyl-alkyl- and lyso-phosphatidylcholine; diacyl, acyl-alkyl PCs, Diacyl- and acyl-alkyl-phosphatidylcholine; diacyl, acyl-alkyl, lysoPCs, SMs, Diacyl-, acyl-alkyl-, lyso- phosphatidylcholines and sphingomyelins; The lipids are abbreviated as Cx:y, where x and y are the the cumulative number of carbon atoms and number of double bonds, respectively.
